# Supplementary material
Source: MDPI journal article supplement (https://www.mdpi.com/2079-9276/8/2/107)
Supplement: s1 [file s1]

# Effect of Ambient Parameters on the Temperature Distribution of Photovoltaic (PV) Modules

Divine Atsu <sup>1,2</sup> and Alok Dhaundiyal <sup>1,\*</sup>

<sup>1</sup> Doctoral School of Mechanical Engineering, Szent Istvan University, 2100 Godollo, Hungary;  
atsud22@yahoo.com

<sup>2</sup> Dept. of Energy Systems Engineering, Koforidua Technical University, KF-981 Koforidua, Ghana

\* Correspondence: alok.dext@hotmail.com

## Supplementary Materials:

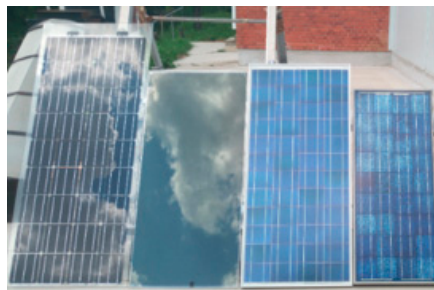

Figure S1. Studied solar PV modules.

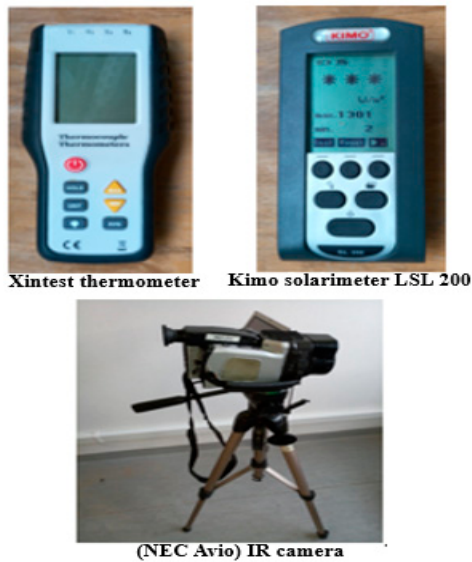

Figure S2. Data acquisition Instruments.
